# Supplementary material for: Treatment of developmental hip dysplasia under 24 months by modified anterior open reduction: A short-term follow-up study
Source: Research Square preprint supplement (doi:10.21203/rs.3.rs-1827946/v1), 2022-07-08
Supplement: Supplementary file 1 [file 31064b7da7fd9907eed10cbd.docx]

Table 1 Eligibility criteria for inclusion and exclusion of the study participants

| Inclusion criteria Exclusion criteria |
| --- |
| A diagnosis of Idiopathic DDH < 6 or> 24 months old at the age of surgery  Cases which underwent a modified anterior < 2 years of follow-up or lost to follow-up  small incision approach open reduction Concomitant neuromuscular comorbidities  Between 6 and 24 months at the age of surgery Teratological dislocations  Being willing to participate the study Previous failed open reduction  Being unwilling to participate the study |

Table2 Demographic characteristics of the study participants

| Characteristic outcome |
| --- |
| Gender 5 M, 40F  Side 35R, 25L  Bilateral involvement 15  Unilateral involvement 30  Mean age at surgery (month) 19 ± 2.8 (range 7–24)  Fllow-up duration (month) 32 ± 4.2 (range 24-48)  Unilateral operative time(min) 25 ± 2.8  Bilateral operation time(min) 45 ± 4.5  Unilateral intraoperative blood loss (ml) 10.0 ± 4.2  Bilateral intraoperative blood loss(ml) 25.0 ± 1.3  Length of the scar(cm) 2.5 ± 0.5  The mean abduction angle in spica cast(°) 50± 3.2(range 45°–60°) |

Table3 Modified McKay Criteria for functional results

| Grade Description |
| --- |
| Excellent Stable, painless, no limp, negative Trendelenburg sign, full range of motion  Good Stable, painless, normal gait or slight limp, negative Trendelenburg sign, slight limitation of motion  Fair Stable, painless, limp, positive Trendelenburg sign, moderate limitation of motion  Poor Unstable or painful hip, or both; positive Trendelenburg sign |

Table 4   Clinical outcomes of the hips

| Modified McKay’s clinical criteria (Grade I–IV ) n (%) |
| --- |
| Excellent(I) 44(73.3)  Good( II) 14(23.3)  Fair( III) 2(3.3)  Poor(IV) 0(0) |

| Table 5   Radiographic outcomes of the patients |
| --- |
| Parameters values  Preoperative AI degree (°)  Min–Max 29–45  Mean ± SD 35.03 ± 2.18  AI at the final follow-up degree (°)  Min–Max 16–33  Mean ± SD 20.68 ± 2.01  Final CEA degree (°)  Min–Max 18–32  Mean ± SD 23.15 ± 2.05  Severin’s radiographic classifcation  Grade; n (%) I: 31 (51.7)  II:25 (41.7)  III:3 (5)  IV:1 (1.7) |

Table 6 Severin Classification System for Developmental Dysplasia of the Hip

| Class Radiographic Appearance Center-edge Angle(Degrees) |
| --- |
| Ia Normal >19 (6-13-y-old)  >25 (≥14-y-old)  Ib Normal 15-19 (6-13-y-old)  20-25 (≥4-y-old)  II Moderate deformity of femoral head, Same as class I  femoral neck, or acetabulum  III Dysplasia without subluxation <15 (6-13-y-old)  <20 (≥14-y-old)  IVa Moderate subluxation ≥0  IVb Severe subluxation <0  V Femoral head articulates with  pseudoacetabulum in superior part  of the original acetabulum  VI Redislocation |

Table 7 The distribution of Preoperative Tonnis grading and postoperative the presence of AVN

| Preoperative Tonnis grading n (%) The presence of AVN n(%)  Yes No |
| --- |
| II 38 (63.3) 0 (0) 38 (63.3)  III 17 (28.3) 0 (0) 17 (28.3)  IV 5 (8.3) 3 (5) 2 (3.3) |

Table 8 At the final follow-up outcomes in different acetabular index ranges

| Preoperative AI At the final follow-up outcomes n (%)  normal pelvis radiographs residual acetabular dysplasia subluxation |
| --- |
| less than 30° 24(40) 0 0  between 30° and 40° 30(50) 0 0  greater than 40° 2(3.3) 3(5) 1(1.7) |
